# Supplementary material for: Donor disposition and aliphatic conformation effects on structure in luminescent zinc dicarboxylate coordination polymers with isomeric dipyridylamide coligands
Source: Royal Society of Chemistry journal article supplement (doi:10.1039/c2ce26929e), 2013-01-01

## **ELECTRONIC SUPPLEMENTARY INFORMATION**

Donor Disposition and Aliphatic Conformation Effects on Structure in Luminescent Zinc  
Dicarboxylate Coordination Polymers with Dipyridylamide Coligands

Jacob W. Uebler, Julie A. Wilson, Robert L. LaDuca<sup>†\*</sup>

Table S1. Hydrogen bonding parameters for **1–6**.

| $D-H\cdots A$        | $d(H\cdots A)$ | $d(D\cdots A)$ | $\angle DHA$ | symmetry transformation for $A$ |
|----------------------|----------------|----------------|--------------|---------------------------------|
| <b>1</b>             |                |                |              |                                 |
| O1W–H1WA $\cdots$ O5 | 2.43(2)        | 3.223(3)       | 155(3)       |                                 |
| O1W–H1WB $\cdots$ O5 | 2.077(19)      | 2.879(3)       | 156(3)       | $-x,-y,-z$                      |
| N2–H2N $\cdots$ O1W  | 2.05           | 2.829(3)       | 146.7        | $-x+1/2,y+1/2,-z+1/2$           |
| <b>2</b>             |                |                |              |                                 |
| N2–H2N $\cdots$ O4   | 1.95(2)        | 2.803(4)       | 156(4)       | $x,-y+3/2,z+1/2$                |
| <b>3</b>             |                |                |              |                                 |
| N3–H3 $\cdots$ O2    | 1.90           | 2.755(4)       | 162.4        | $-x+1/2,-y+1/2,-z+1$            |
| N3A–H3A $\cdots$ O2  | 1.90           | 2.777(10)      | 174.4        | $-x+1/2,-y+1/2,-z+1$            |
| <b>4</b>             |                |                |              |                                 |
| O5–H5A $\cdots$ O1   | 2.133(17)      | 2.951(2)       | 169(3)       | $-x+2,-y,-z+1$                  |
| N3–H3N $\cdots$ O2   | 1.939(18)      | 2.787(3)       | 166(3)       | $-x+1,-y,-z+1$                  |
| <b>5</b>             |                |                |              |                                 |
| N2–H2 $\cdots$ O1    | 2.14           | 2.885(18)      | 142.1        | $-x,-y+1,-z+1$                  |
| N2A–H2A1 $\cdots$ O1 | 2.07           | 2.79(2)        | 138.9        | $-x,-y+1,-z+1$                  |
| <b>6</b>             |                |                |              |                                 |
| N2–H2N $\cdots$ O3   | 2.187(17)      | 3.025(2)       | 160(2)       |                                 |

Figure S1. Stacking pattern of  $[\text{Zn}_3(\text{mal})_2(\text{OH})_2(4\text{-pina})_2]_n$  layers in **4**. Hydrogen bonding is shown as dashed lines.

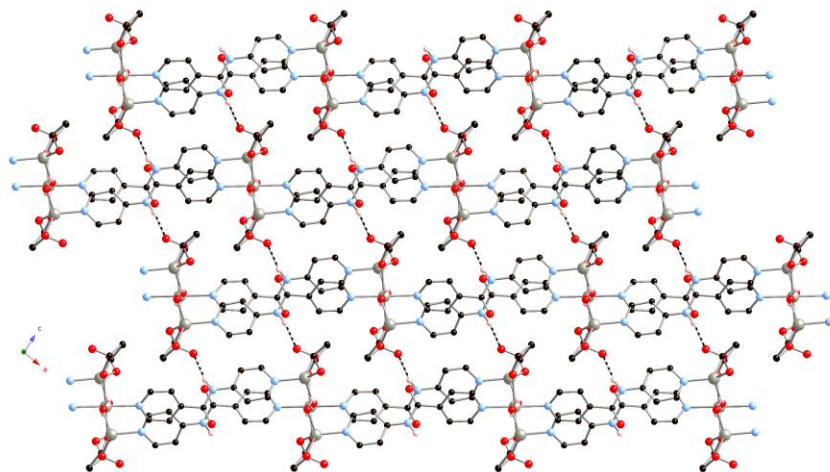

Figure S2. Stacking of  $[\text{Zn}(\text{suc})(4\text{-pna})]_n$  layers in **6**. Hydrogen bonding is shown as dashed lines.

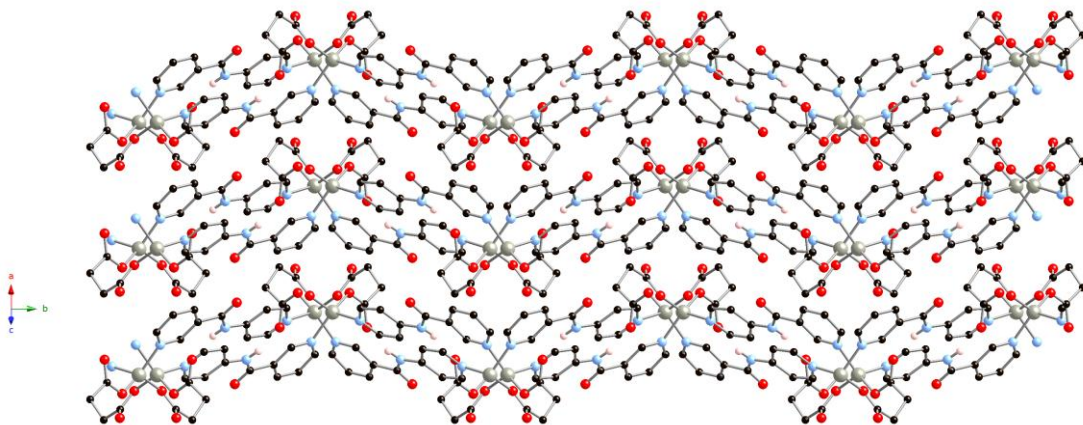

Figure S3. TGA plot for **1**.

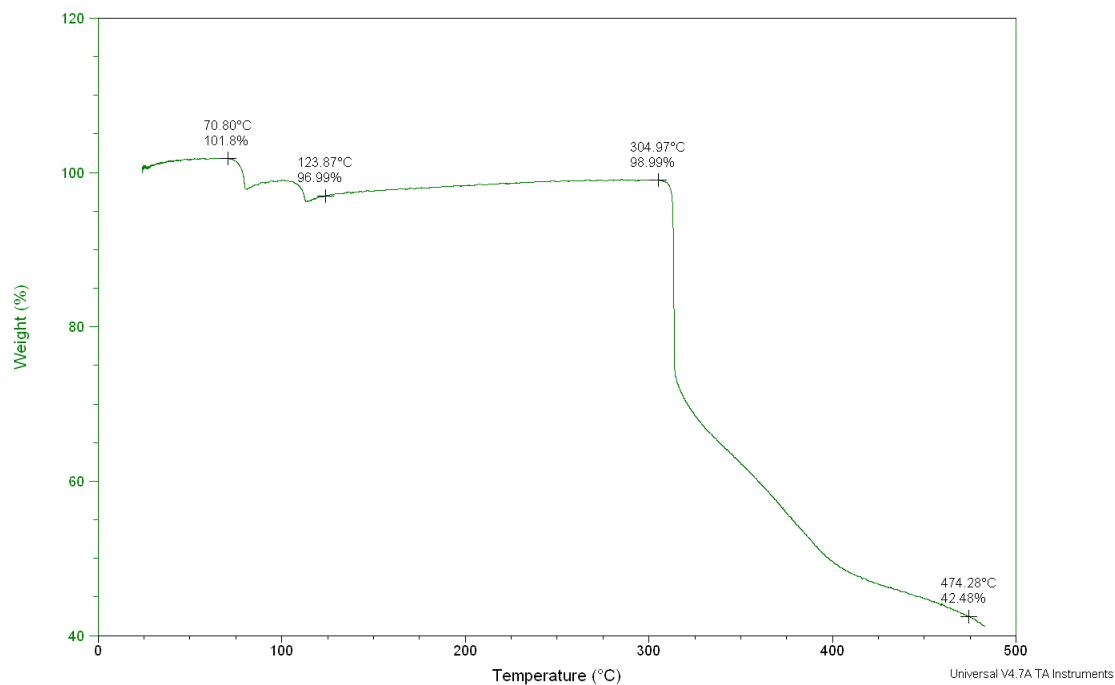

Figure S4. TGA plot for **2**.

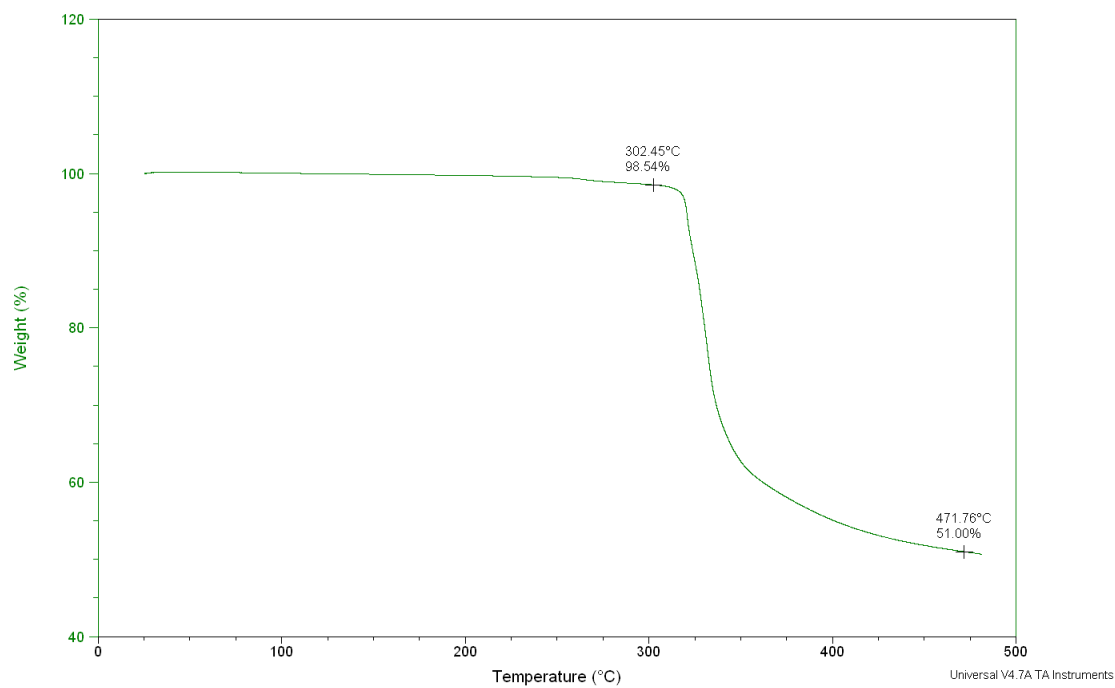

Figure S5. TGA plot for **3**.

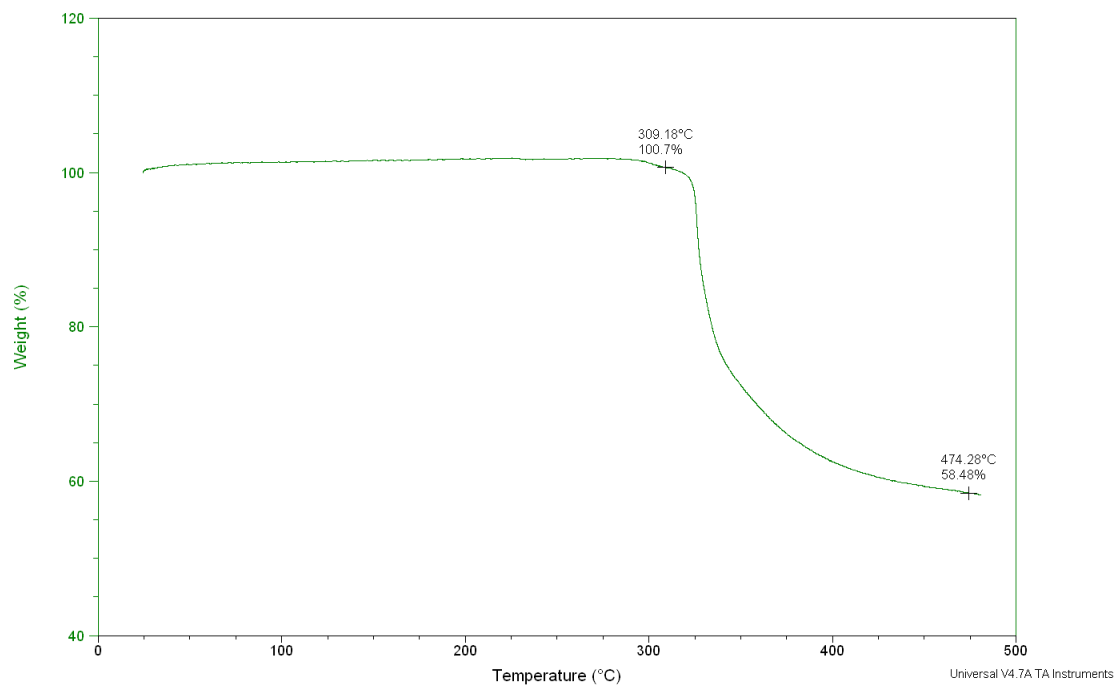

Figure S6. TGA plot for **4**.

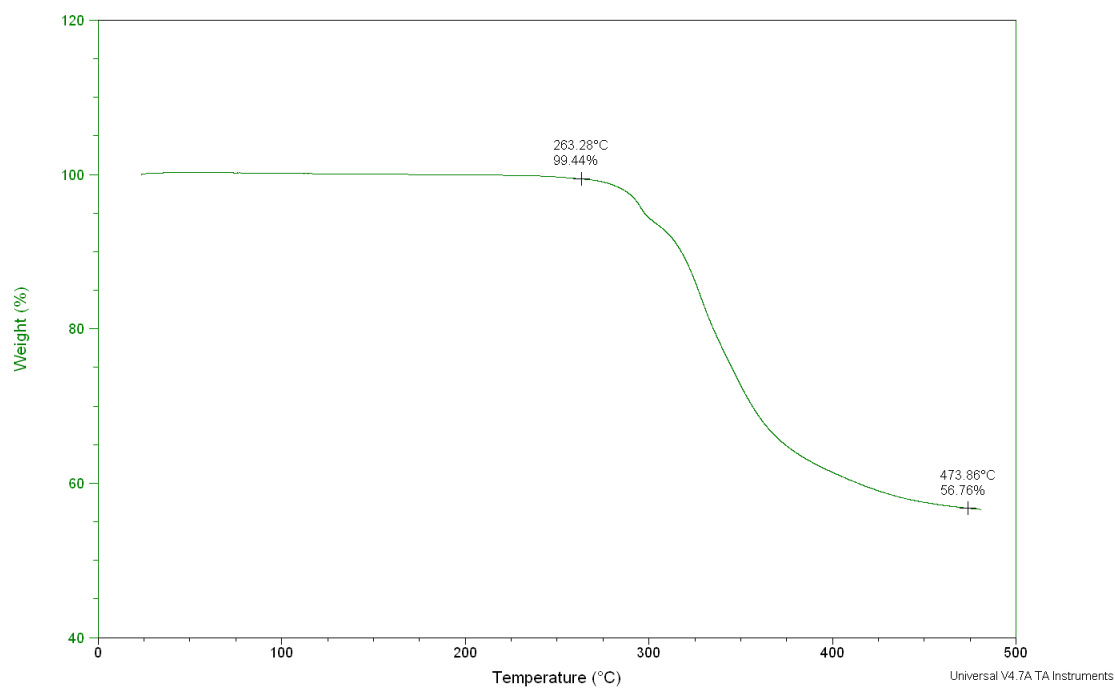

Figure S7. TGA plot for **5**.

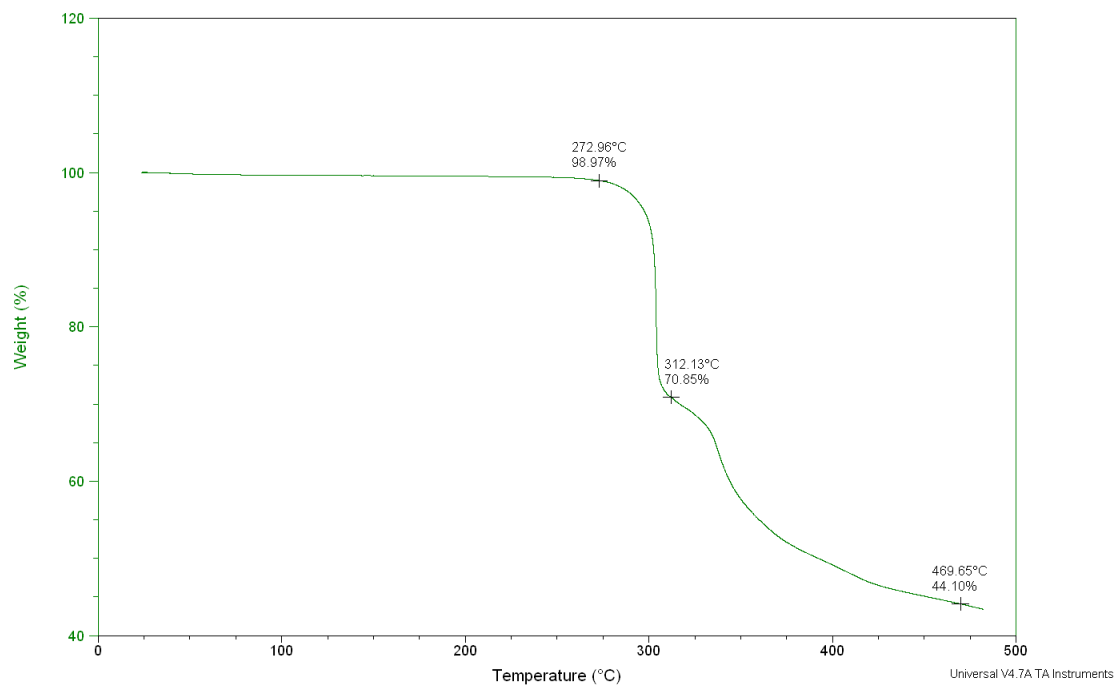

Supplement: c2ce26929e.pdf [file c2ce26929e.pdf]
